# Supplementary material for: Conductometric Studies of Formation the Inclusion Complexes of Phenolic Acids with β-Cyclodextrin and 2-HP-β-Cyclodextrin in Aqueous Solutions
Source: MDPI journal article supplement (doi:10.3390/molecules28010292), 2022-12-29
Supplement: s1 [file s1]

# Conductometric studies of formation the inclusion complexes of phenolic acids with $\beta$ -cyclodextrin and 2-HP- $\beta$ -cyclodextrin in aqueous solutions.

Zdzisław Kinart\*

Department of Physical Chemistry, Faculty of Chemistry, University of Lodz, Pomorska 163/165,  
90-236 Lodz, Poland

\* Correspondence: [zdzislaw.kinart@chemia.uni.lodz.pl](mailto:zdzislaw.kinart@chemia.uni.lodz.pl)

**Table S1.** Densities, viscosities and relative permittivities of pure water at temperatures  $T = (288.15 \text{ to } 318.15) \text{ K}$ .

| T/K    | $\rho_o/\text{kg}\cdot\text{m}^{-3}$ <sup>a</sup> | $10^3\cdot\eta/\text{Pa}\cdot\text{s}$ <sup>a</sup> | $\epsilon_r$ <sup>b</sup> |
|--------|---------------------------------------------------|-----------------------------------------------------|---------------------------|
| 283.15 | 999.700                                           | 1.130                                               | 83.95                     |
| 288.15 | 999.100                                           | 1.138                                               | 82.07                     |
| 293.15 | 998.205                                           | 1.002                                               | 80.21                     |
| 298.15 | 997.047                                           | 0.890                                               | 78.40                     |
| 303.15 | 995.651                                           | 0.797                                               | 76.62                     |
| 308.15 | 994.038                                           | 0.719                                               | 74.89                     |
| 313.15 | 992.224                                           | 0.653                                               | 73.19                     |
| 318.15 | 990.223                                           | 0.596                                               | 71.53                     |

<sup>a</sup> values for water recommended by the International Association for the Properties of Water and Steam (IAPWS) calculated on the online property calculator ([https://web1.hszg.de/thermo\\_fpc/](https://web1.hszg.de/thermo_fpc/))

<sup>b</sup> values for water calculated according to the IAPWS recommendations (<http://www.iapws.org/relguide/dielec.pdf>)

**Table S2.** The value of molar concentration of salt  $C_{\text{salt}}$  [mol/dm<sup>3</sup>], concentration of ligand  $C_{\text{lig}}$  [mol/dm<sup>3</sup>], molar conductivity  $\Lambda$  [S·cm<sup>2</sup>·mol<sup>-1</sup>] for  $\beta$ -cyclodextrin with trans-cinnamic acid sodium salt in water at all tested temperatures at pressure  $p = 0.1$  MPa.<sup>a</sup>

| sodium salt of trans-cinnamic acid with $\beta$ -cyclodextrin |                                             |                                            |                                                        |                                                        |                                                        |                                                        |                                                        |                                                        |                                                        |
|---------------------------------------------------------------|---------------------------------------------|--------------------------------------------|--------------------------------------------------------|--------------------------------------------------------|--------------------------------------------------------|--------------------------------------------------------|--------------------------------------------------------|--------------------------------------------------------|--------------------------------------------------------|
| Nr                                                            | $C_{\text{salt}}$<br>[mol/dm <sup>3</sup> ] | $C_{\text{lig}}$<br>[mol/dm <sup>3</sup> ] | 283.15                                                 | 288.15                                                 | 293.15                                                 | 298.15                                                 | 303.15                                                 | 308.15                                                 | 313.15                                                 |
|                                                               |                                             |                                            | $\Lambda_m$<br>[S·cm <sup>2</sup> ·mol <sup>-1</sup> ] |
| 1.                                                            | 0.00269                                     | 0.00000                                    | 49.2734                                                | 57.8734                                                | 69.7734                                                | 84.7934                                                | 94.9034                                                | 106.4034                                               | 118.4334                                               |
| 2.                                                            | 0.00263                                     | 0.00030                                    | 49.1178                                                | 57.7178                                                | 69.6178                                                | 84.6378                                                | 94.7478                                                | 106.2478                                               | 118.2778                                               |
| 3.                                                            | 0.00257                                     | 0.00060                                    | 48.8742                                                | 57.4742                                                | 69.3742                                                | 84.3942                                                | 94.5042                                                | 106.0042                                               | 118.0342                                               |
| 4.                                                            | 0.00251                                     | 0.00091                                    | 48.6399                                                | 57.2399                                                | 69.1399                                                | 84.1599                                                | 94.2699                                                | 105.7699                                               | 117.7999                                               |
| 5.                                                            | 0.00244                                     | 0.00121                                    | 48.4521                                                | 57.0521                                                | 68.9521                                                | 83.9721                                                | 94.0821                                                | 105.5821                                               | 117.6121                                               |
| 6.                                                            | 0.00239                                     | 0.00149                                    | 48.2658                                                | 56.8658                                                | 68.7658                                                | 83.7858                                                | 93.8958                                                | 105.3958                                               | 117.4258                                               |
| 7.                                                            | 0.00232                                     | 0.00181                                    | 47.9855                                                | 56.5855                                                | 68.4855                                                | 83.5055                                                | 93.6155                                                | 105.1155                                               | 117.1455                                               |
| 8.                                                            | 0.00226                                     | 0.00208                                    | 47.7513                                                | 56.3513                                                | 68.2513                                                | 83.2713                                                | 93.3813                                                | 104.8813                                               | 116.9113                                               |
| 9.                                                            | 0.00221                                     | 0.00235                                    | 47.5558                                                | 56.1558                                                | 68.0558                                                | 83.0758                                                | 93.1858                                                | 104.6858                                               | 116.7158                                               |
| 10.                                                           | 0.00214                                     | 0.00270                                    | 47.2835                                                | 55.8835                                                | 67.7835                                                | 82.8035                                                | 92.9135                                                | 104.4135                                               | 116.4435                                               |
| 11.                                                           | 0.00208                                     | 0.00299                                    | 47.1018                                                | 55.7018                                                | 67.6018                                                | 82.6218                                                | 92.7318                                                | 104.2318                                               | 116.2618                                               |
| 12.                                                           | 0.00202                                     | 0.00329                                    | 46.8764                                                | 55.4764                                                | 67.3764                                                | 82.3964                                                | 92.5064                                                | 104.0064                                               | 116.0364                                               |
| 13.                                                           | 0.00195                                     | 0.00359                                    | 46.6802                                                | 55.2802                                                | 67.1802                                                | 82.2002                                                | 92.3102                                                | 103.8102                                               | 115.8402                                               |
| 14.                                                           | 0.00189                                     | 0.00388                                    | 46.4438                                                | 55.0438                                                | 66.9438                                                | 81.9638                                                | 92.0738                                                | 103.5738                                               | 115.6038                                               |
| 15.                                                           | 0.00183                                     | 0.00416                                    | 46.2263                                                | 54.8263                                                | 66.7263                                                | 81.7463                                                | 91.8563                                                | 103.3563                                               | 115.3863                                               |
| 16.                                                           | 0.00177                                     | 0.00448                                    | 46.0045                                                | 54.6045                                                | 66.5045                                                | 81.5245                                                | 91.6345                                                | 103.1345                                               | 115.1645                                               |
| 17.                                                           | 0.00171                                     | 0.00477                                    | 45.8121                                                | 54.4121                                                | 66.3121                                                | 81.3321                                                | 91.4421                                                | 102.9421                                               | 114.9721                                               |
| 18.                                                           | 0.00164                                     | 0.00506                                    | 45.6401                                                | 54.2401                                                | 66.1401                                                | 81.1601                                                | 91.2701                                                | 102.7701                                               | 114.8001                                               |
| 19.                                                           | 0.00159                                     | 0.00534                                    | 45.4027                                                | 54.0027                                                | 65.9027                                                | 80.9227                                                | 91.0327                                                | 102.5327                                               | 114.5627                                               |
| 20.                                                           | 0.00153                                     | 0.00564                                    | 45.2034                                                | 53.8034                                                | 65.7034                                                | 80.7234                                                | 90.8334                                                | 102.3334                                               | 114.3634                                               |
| 21.                                                           | 0.00147                                     | 0.00591                                    | 44.9945                                                | 53.5945                                                | 65.4945                                                | 80.5145                                                | 90.6245                                                | 102.1245                                               | 114.1545                                               |
| 22.                                                           | 0.00141                                     | 0.00620                                    | 44.8742                                                | 53.4742                                                | 65.3742                                                | 80.3942                                                | 90.5042                                                | 102.0042                                               | 114.0342                                               |
| 23.                                                           | 0.00134                                     | 0.00654                                    | 44.7909                                                | 53.3909                                                | 65.2909                                                | 80.3109                                                | 90.4209                                                | 101.9209                                               | 113.9509                                               |

<sup>a</sup>Standard uncertainties are  $u(T) = 0.01$  K,  $u(p) = 0.05$  MPa,  $u(c) = 10^{-4} \cdot c$ , and the combined expanded uncertainty is  $U_c(\Lambda) = 0.0005 \cdot \Lambda$  (level of confidence = 0.95).

**Table S3.** The value of molar concentration of salt  $C_{\text{salt}}$  [mol/dm<sup>3</sup>], concentration of ligand  $C_{\text{lig}}$  [mol/dm<sup>3</sup>], molar conductivity  $\Lambda$  [S·cm<sup>2</sup>·mol<sup>-1</sup>] for 2-HP- $\beta$ -cyclodextrin with trans-cinnamic acid sodium salt in water at all tested temperatures..

| sodium salt of trans-cinnamic acid with 2-HP- $\beta$ -cyclodextrin |                        |                        |                                                        |                                                        |                                                        |                                                        |                                                        |                                                        |                                                        |
|---------------------------------------------------------------------|------------------------|------------------------|--------------------------------------------------------|--------------------------------------------------------|--------------------------------------------------------|--------------------------------------------------------|--------------------------------------------------------|--------------------------------------------------------|--------------------------------------------------------|
| Nr                                                                  | $C_{\text{salt}}$      | $C_{\text{lig}}$       | 283.15                                                 | 288.15                                                 | 293.15                                                 | 298.15                                                 | 303.15                                                 | 308.15                                                 | 313.15                                                 |
|                                                                     | [mol/dm <sup>3</sup> ] | [mol/dm <sup>3</sup> ] | $\Lambda_m$<br>[S·cm <sup>2</sup> ·mol <sup>-1</sup> ] |
| 1.                                                                  | 0.00295                | 0.00000                | 45.6472                                                | 57.6972                                                | 67.2372                                                | 82.0872                                                | 91.7572                                                | 104.4372                                               | 114.3672                                               |
| 2.                                                                  | 0.00289                | 0.00031                | 45.5263                                                | 57.5763                                                | 67.1163                                                | 81.9663                                                | 91.6363                                                | 104.3163                                               | 114.2463                                               |
| 3.                                                                  | 0.00283                | 0.00062                | 45.4610                                                | 57.5110                                                | 67.0510                                                | 81.9010                                                | 91.5710                                                | 104.2510                                               | 114.1810                                               |
| 4.                                                                  | 0.00277                | 0.00091                | 45.3736                                                | 57.4236                                                | 66.9636                                                | 81.8136                                                | 91.4836                                                | 104.1636                                               | 114.0936                                               |
| 5.                                                                  | 0.00272                | 0.00119                | 45.2867                                                | 57.3367                                                | 66.8767                                                | 81.7267                                                | 91.3967                                                | 104.0767                                               | 114.0067                                               |
| 6.                                                                  | 0.00266                | 0.00150                | 45.2067                                                | 57.2567                                                | 66.7967                                                | 81.6467                                                | 91.3167                                                | 103.9967                                               | 113.9267                                               |
| 7.                                                                  | 0.00260                | 0.00179                | 45.0917                                                | 57.1417                                                | 66.6817                                                | 81.5317                                                | 91.2017                                                | 103.8817                                               | 113.8117                                               |
| 8.                                                                  | 0.00254                | 0.00210                | 45.0073                                                | 57.0573                                                | 66.5973                                                | 81.4473                                                | 91.1173                                                | 103.7973                                               | 113.7273                                               |
| 9.                                                                  | 0.00249                | 0.00239                | 44.9153                                                | 56.9653                                                | 66.5053                                                | 81.3553                                                | 91.0253                                                | 103.7053                                               | 113.6353                                               |
| 10.                                                                 | 0.00243                | 0.00268                | 44.8407                                                | 56.8907                                                | 66.4307                                                | 81.2807                                                | 90.9507                                                | 103.6307                                               | 113.5607                                               |
| 11.                                                                 | 0.00237                | 0.00299                | 44.7526                                                | 56.8026                                                | 66.3426                                                | 81.1926                                                | 90.8626                                                | 103.5426                                               | 113.4726                                               |
| 12.                                                                 | 0.00231                | 0.00328                | 44.6649                                                | 56.7149                                                | 66.2549                                                | 81.1049                                                | 90.7749                                                | 103.4549                                               | 113.3849                                               |
| 13.                                                                 | 0.00225                | 0.00358                | 44.6168                                                | 56.6668                                                | 66.2068                                                | 81.0568                                                | 90.7268                                                | 103.4068                                               | 113.3368                                               |
| 14.                                                                 | 0.00220                | 0.00388                | 44.5703                                                | 56.6203                                                | 66.1603                                                | 81.0103                                                | 90.6803                                                | 103.3603                                               | 113.2903                                               |
| 15.                                                                 | 0.00214                | 0.00417                | 44.5152                                                | 56.5652                                                | 66.1052                                                | 80.9552                                                | 90.6252                                                | 103.3052                                               | 113.2352                                               |
| 16.                                                                 | 0.00208                | 0.00448                | 44.4494                                                | 56.4994                                                | 66.0394                                                | 80.8894                                                | 90.5594                                                | 103.2394                                               | 113.1694                                               |
| 17.                                                                 | 0.00202                | 0.00477                | 44.4083                                                | 56.4583                                                | 65.9983                                                | 80.8483                                                | 90.5183                                                | 103.1983                                               | 113.1283                                               |
| 18.                                                                 | 0.00197                | 0.00506                | 44.3633                                                | 56.4133                                                | 65.9533                                                | 80.8033                                                | 90.4733                                                | 103.1533                                               | 113.0833                                               |
| 19.                                                                 | 0.00191                | 0.00536                | 44.3356                                                | 56.3856                                                | 65.9256                                                | 80.7756                                                | 90.4456                                                | 103.1256                                               | 113.0556                                               |
| 20.                                                                 | 0.00185                | 0.00565                | 44.3038                                                | 56.3538                                                | 65.8938                                                | 80.7438                                                | 90.4138                                                | 103.0938                                               | 113.0238                                               |
| 21.                                                                 | 0.00180                | 0.00595                | 44.2657                                                | 56.3157                                                | 65.8557                                                | 80.7057                                                | 90.3757                                                | 103.0557                                               | 112.9857                                               |
| 22.                                                                 | 0.00174                | 0.00625                | 44.2456                                                | 56.2956                                                | 65.8356                                                | 80.6856                                                | 90.3556                                                | 103.0356                                               | 112.9656                                               |
| 23.                                                                 | 0.00168                | 0.00655                | 44.2042                                                | 56.2542                                                | 65.7942                                                | 80.6442                                                | 90.3142                                                | 102.9942                                               | 112.9242                                               |

**Table S4.** The value of molar concentration of salt  $C_{\text{salt}}$  [mol/dm<sup>3</sup>], concentration of ligand  $C_{\text{lig}}$  [mol/dm<sup>3</sup>], molar conductivity  $\Lambda$  [S·cm<sup>2</sup>·mol<sup>-1</sup>] for  $\beta$ -cyclodextrin with trans-p-coumaric acid sodium salt in water at all tested temperatures.

| sodium salt of trans-p-coumaric acid with $\beta$ -cyclodextrin |                        |                        |                                         |                                         |                                         |                                         |                                         |                                         |                                         |
|-----------------------------------------------------------------|------------------------|------------------------|-----------------------------------------|-----------------------------------------|-----------------------------------------|-----------------------------------------|-----------------------------------------|-----------------------------------------|-----------------------------------------|
| Nr                                                              | $C_{\text{salt}}$      | $C_{\text{lig}}$       | 283.15                                  | 288.15                                  | 293.15                                  | 298.15                                  | 303.15                                  | 308.15                                  | 313.15                                  |
|                                                                 | [mol/dm <sup>3</sup> ] | [mol/dm <sup>3</sup> ] | $\Lambda_m$                             |
|                                                                 |                        |                        | [S·cm <sup>2</sup> ·mol <sup>-1</sup> ] |
| 1.                                                              | 0.002831               | 0                      | 42.1381                                 | 52.4381                                 | 59.7581                                 | 67.3481                                 | 74.7981                                 | 83.4481                                 | 88.8981                                 |
| 2.                                                              | 0.002776               | 0.000293               | 42.0251                                 | 52.3251                                 | 59.6451                                 | 67.2351                                 | 74.6851                                 | 83.3351                                 | 88.7851                                 |
| 3.                                                              | 0.002718               | 0.000603               | 41.8889                                 | 52.1889                                 | 59.5089                                 | 67.0989                                 | 74.5489                                 | 83.1989                                 | 88.6489                                 |
| 4.                                                              | 0.002662               | 0.000903               | 41.8049                                 | 52.1049                                 | 59.4249                                 | 67.0149                                 | 74.4649                                 | 83.1149                                 | 88.5649                                 |
| 5.                                                              | 0.002607               | 0.001199               | 41.6812                                 | 51.9812                                 | 59.3012                                 | 66.8912                                 | 74.3412                                 | 82.9912                                 | 88.4412                                 |
| 6.                                                              | 0.002553               | 0.001489               | 41.5858                                 | 51.8858                                 | 59.2058                                 | 66.7958                                 | 74.2458                                 | 82.8958                                 | 88.3458                                 |
| 7.                                                              | 0.002496               | 0.001794               | 41.4763                                 | 51.7763                                 | 59.0963                                 | 66.6863                                 | 74.1363                                 | 82.7863                                 | 88.2363                                 |
| 8.                                                              | 0.002439               | 0.002103               | 41.3878                                 | 51.6878                                 | 59.0078                                 | 66.5978                                 | 74.0478                                 | 82.6978                                 | 88.1478                                 |
| 9.                                                              | 0.002384               | 0.002394               | 41.2987                                 | 51.5987                                 | 58.9187                                 | 66.5087                                 | 73.9587                                 | 82.6087                                 | 88.0587                                 |
| 10.                                                             | 0.00233                | 0.002688               | 41.1881                                 | 51.4881                                 | 58.8081                                 | 66.3981                                 | 73.8481                                 | 82.4981                                 | 87.9481                                 |
| 11.                                                             | 0.002273               | 0.00299                | 41.0579                                 | 51.3579                                 | 58.6779                                 | 66.2679                                 | 73.7179                                 | 82.3679                                 | 87.8179                                 |
| 12.                                                             | 0.002219               | 0.003282               | 40.9809                                 | 51.2809                                 | 58.6009                                 | 66.1909                                 | 73.6409                                 | 82.2909                                 | 87.7409                                 |
| 13.                                                             | 0.002164               | 0.003579               | 40.8567                                 | 51.1567                                 | 58.4767                                 | 66.0667                                 | 73.5167                                 | 82.1667                                 | 87.6167                                 |
| 14.                                                             | 0.002108               | 0.003878               | 40.7799                                 | 51.0799                                 | 58.3999                                 | 65.9899                                 | 73.4399                                 | 82.0899                                 | 87.5399                                 |
| 15.                                                             | 0.002052               | 0.004177               | 40.7217                                 | 51.0217                                 | 58.3417                                 | 65.9317                                 | 73.3817                                 | 82.0317                                 | 87.4817                                 |
| 16.                                                             | 0.001998               | 0.004466               | 40.6618                                 | 50.9618                                 | 58.2818                                 | 65.8718                                 | 73.3218                                 | 81.9718                                 | 87.4218                                 |
| 17.                                                             | 0.001944               | 0.004758               | 40.6231                                 | 50.9231                                 | 58.2431                                 | 65.8331                                 | 73.2831                                 | 81.9331                                 | 87.3831                                 |
| 18.                                                             | 0.001886               | 0.005068               | 40.5872                                 | 50.8872                                 | 58.2072                                 | 65.7972                                 | 73.2472                                 | 81.8972                                 | 87.3472                                 |
| 19.                                                             | 0.001832               | 0.005357               | 40.5595                                 | 50.8595                                 | 58.1795                                 | 65.7695                                 | 73.2195                                 | 81.8695                                 | 87.3195                                 |
| 20.                                                             | 0.001778               | 0.005649               | 40.5386                                 | 50.8386                                 | 58.1586                                 | 65.7486                                 | 73.1986                                 | 81.8486                                 | 87.2986                                 |
| 21.                                                             | 0.001722               | 0.005948               | 40.5178                                 | 50.8178                                 | 58.1378                                 | 65.7278                                 | 73.1778                                 | 81.8278                                 | 87.2778                                 |
| 22.                                                             | 0.001668               | 0.006238               | 40.4925                                 | 50.7925                                 | 58.1125                                 | 65.7025                                 | 73.1525                                 | 81.8025                                 | 87.2525                                 |
| 23.                                                             | 0.001614               | 0.006528               | 40.4811                                 | 50.7811                                 | 58.1011                                 | 65.6911                                 | 73.1411                                 | 81.7911                                 | 87.2411                                 |

**Table S5.** The value of molar concentration of salt  $C_{\text{salt}}$  [mol/dm<sup>3</sup>], concentration of ligand  $C_{\text{lig}}$  [mol/dm<sup>3</sup>], molar conductivity  $\Lambda$  [S·cm<sup>2</sup>·mol<sup>-1</sup>] for 2-HP- $\beta$ -cyclodextrin with trans-p-coumaric acid sodium salt in water at all tested temperatures.

| sodium salt of trans-p-coumaric acid with 2-HP- $\beta$ -cyclodextrin |                        |                        |                                                        |                                                        |                                                        |                                                        |                                                        |                                                        |                                                        |
|-----------------------------------------------------------------------|------------------------|------------------------|--------------------------------------------------------|--------------------------------------------------------|--------------------------------------------------------|--------------------------------------------------------|--------------------------------------------------------|--------------------------------------------------------|--------------------------------------------------------|
| Nr                                                                    | $C_{\text{salt}}$      | $C_{\text{lig}}$       | 283.15                                                 | 288.15                                                 | 293.15                                                 | 298.15                                                 | 303.15                                                 | 308.15                                                 | 313.15                                                 |
|                                                                       | [mol/dm <sup>3</sup> ] | [mol/dm <sup>3</sup> ] | $\Lambda_m$<br>[S·cm <sup>2</sup> ·mol <sup>-1</sup> ] |
| 1.                                                                    | 0.002938               | 0                      | 41.3464                                                | 50.6464                                                | 57.7964                                                | 65.7864                                                | 73.9664                                                | 82.0564                                                | 87.4264                                                |
| 2.                                                                    | 0.00288                | 0.000299               | 41.1332                                                | 50.4332                                                | 57.5832                                                | 65.5732                                                | 73.7532                                                | 81.8432                                                | 87.2132                                                |
| 3.                                                                    | 0.002823               | 0.000597               | 40.9233                                                | 50.2233                                                | 57.3733                                                | 65.3633                                                | 73.5433                                                | 81.6333                                                | 87.0033                                                |
| 4.                                                                    | 0.002766               | 0.000891               | 40.7203                                                | 50.0203                                                | 57.1703                                                | 65.1603                                                | 73.3403                                                | 81.4303                                                | 86.8003                                                |
| 5.                                                                    | 0.002707               | 0.001194               | 40.4468                                                | 49.7468                                                | 56.8968                                                | 64.8868                                                | 73.0668                                                | 81.1568                                                | 86.5268                                                |
| 6.                                                                    | 0.002649               | 0.001492               | 40.1505                                                | 49.4505                                                | 56.6005                                                | 64.5905                                                | 72.7705                                                | 80.8605                                                | 86.2305                                                |
| 7.                                                                    | 0.002591               | 0.001791               | 39.9181                                                | 49.2181                                                | 56.3681                                                | 64.3581                                                | 72.5381                                                | 80.6281                                                | 85.9981                                                |
| 8.                                                                    | 0.002535               | 0.002084               | 39.6919                                                | 48.9919                                                | 56.1419                                                | 64.1319                                                | 72.3119                                                | 80.4019                                                | 85.7719                                                |
| 9.                                                                    | 0.002477               | 0.002382               | 39.4914                                                | 48.7914                                                | 55.9414                                                | 63.9314                                                | 72.1114                                                | 80.2014                                                | 85.5714                                                |
| 10.                                                                   | 0.002418               | 0.002685               | 39.3217                                                | 48.6217                                                | 55.7717                                                | 63.7617                                                | 71.9417                                                | 80.0317                                                | 85.4017                                                |
| 11.                                                                   | 0.00236                | 0.002985               | 39.2039                                                | 48.5039                                                | 55.6539                                                | 63.6439                                                | 71.8239                                                | 79.9139                                                | 85.2839                                                |
| 12.                                                                   | 0.002304               | 0.003276               | 39.0160                                                | 48.3160                                                | 55.4660                                                | 63.4560                                                | 71.6360                                                | 79.7260                                                | 85.0960                                                |
| 13.                                                                   | 0.002246               | 0.003573               | 38.9434                                                | 48.2434                                                | 55.3934                                                | 63.3834                                                | 71.5634                                                | 79.6534                                                | 85.0234                                                |
| 14.                                                                   | 0.002189               | 0.003868               | 38.8168                                                | 48.1168                                                | 55.2668                                                | 63.2568                                                | 71.4368                                                | 79.5268                                                | 84.8968                                                |
| 15.                                                                   | 0.002131               | 0.004166               | 38.6599                                                | 47.9599                                                | 55.1099                                                | 63.0999                                                | 71.2799                                                | 79.3699                                                | 84.7399                                                |
| 16.                                                                   | 0.002074               | 0.004464               | 38.5430                                                | 47.8430                                                | 54.9930                                                | 62.9830                                                | 71.1630                                                | 79.2530                                                | 84.6230                                                |
| 17.                                                                   | 0.002018               | 0.004754               | 38.4500                                                | 47.7500                                                | 54.9000                                                | 62.8900                                                | 71.0700                                                | 79.1600                                                | 84.5300                                                |
| 18.                                                                   | 0.001958               | 0.005061               | 38.4037                                                | 47.7037                                                | 54.8537                                                | 62.8437                                                | 71.0237                                                | 79.1137                                                | 84.4837                                                |
| 19.                                                                   | 0.001902               | 0.005348               | 38.3576                                                | 47.6576                                                | 54.8076                                                | 62.7976                                                | 70.9776                                                | 79.0676                                                | 84.4376                                                |
| 20.                                                                   | 0.001844               | 0.005648               | 38.2964                                                | 47.5964                                                | 54.7464                                                | 62.7364                                                | 70.9164                                                | 79.0064                                                | 84.3764                                                |
| 21.                                                                   | 0.001789               | 0.005933               | 38.2929                                                | 47.5929                                                | 54.7429                                                | 62.7329                                                | 70.9129                                                | 79.0029                                                | 84.3729                                                |
| 22.                                                                   | 0.001731               | 0.006234               | 38.3204                                                | 47.6204                                                | 54.7704                                                | 62.7604                                                | 70.9404                                                | 79.0304                                                | 84.4004                                                |
| 23.                                                                   | 0.001673               | 0.006535               | 38.3342                                                | 47.6342                                                | 54.7842                                                | 62.7742                                                | 70.9542                                                | 79.0442                                                | 84.4142                                                |

**Table S6.** The value of molar concentration of salt  $C_{\text{salt}}$  [mol/dm<sup>3</sup>], concentration of ligand  $C_{\text{lig}}$  [mol/dm<sup>3</sup>], molar conductivity  $\Lambda$  [S·cm<sup>2</sup>·mol<sup>-1</sup>] for  $\beta$ -cyclodextrin with trans-caffeic acid sodium salt in water at all tested temperatures.

| sodium salt of trans-caffeic acid with $\beta$ -cyclodextrin |                        |                        |                                         |                                         |                                         |                                         |                                         |                                         |                                         |
|--------------------------------------------------------------|------------------------|------------------------|-----------------------------------------|-----------------------------------------|-----------------------------------------|-----------------------------------------|-----------------------------------------|-----------------------------------------|-----------------------------------------|
| Nr                                                           | $C_{\text{salt}}$      | $C_{\text{lig}}$       | 283.15                                  | 288.15                                  | 293.15                                  | 298.15                                  | 303.15                                  | 308.15                                  | 313.15                                  |
|                                                              | [mol/dm <sup>3</sup> ] | [mol/dm <sup>3</sup> ] | $\Lambda_m$                             |
|                                                              |                        |                        | [S·cm <sup>2</sup> ·mol <sup>-1</sup> ] |
| 1.                                                           | 0.00287                | 0                      | 36.3781                                 | 46.6781                                 | 52.9781                                 | 59.6281                                 | 66.3481                                 | 75.4481                                 | 81.3581                                 |
| 2.                                                           | 0.00282                | 0.00030                | 36.2651                                 | 46.5651                                 | 52.8651                                 | 59.5151                                 | 66.2351                                 | 75.3351                                 | 81.2451                                 |
| 3.                                                           | 0.00276                | 0.00058                | 36.1289                                 | 46.4289                                 | 52.7289                                 | 59.3789                                 | 66.0989                                 | 75.1989                                 | 81.1089                                 |
| 4.                                                           | 0.00270                | 0.00088                | 36.0449                                 | 46.3449                                 | 52.6449                                 | 59.2949                                 | 66.0149                                 | 75.1149                                 | 81.0249                                 |
| 5.                                                           | 0.00264                | 0.00121                | 35.9212                                 | 46.2212                                 | 52.5212                                 | 59.1712                                 | 65.8912                                 | 74.9912                                 | 80.9012                                 |
| 6.                                                           | 0.00259                | 0.00148                | 35.8258                                 | 46.1258                                 | 52.4258                                 | 59.0758                                 | 65.7958                                 | 74.8958                                 | 80.8058                                 |
| 7.                                                           | 0.00253                | 0.00178                | 35.7163                                 | 46.0163                                 | 52.3163                                 | 58.9663                                 | 65.6863                                 | 74.7863                                 | 80.6963                                 |
| 8.                                                           | 0.00248                | 0.00207                | 35.6278                                 | 45.9278                                 | 52.2278                                 | 58.8778                                 | 65.5978                                 | 74.6978                                 | 80.6078                                 |
| 9.                                                           | 0.00242                | 0.00237                | 35.5387                                 | 45.8387                                 | 52.1387                                 | 58.7887                                 | 65.5087                                 | 74.6087                                 | 80.5187                                 |
| 10.                                                          | 0.00236                | 0.00266                | 35.4281                                 | 45.7281                                 | 52.0281                                 | 58.6781                                 | 65.3981                                 | 74.4981                                 | 80.4081                                 |
| 11.                                                          | 0.00231                | 0.00294                | 35.2979                                 | 45.5979                                 | 51.8979                                 | 58.5479                                 | 65.2679                                 | 74.3679                                 | 80.2779                                 |
| 12.                                                          | 0.00225                | 0.00324                | 35.2209                                 | 45.5209                                 | 51.8209                                 | 58.4709                                 | 65.1909                                 | 74.2909                                 | 80.2009                                 |
| 13.                                                          | 0.00220                | 0.00355                | 35.0967                                 | 45.3967                                 | 51.6967                                 | 58.3467                                 | 65.0667                                 | 74.1667                                 | 80.0767                                 |
| 14.                                                          | 0.00214                | 0.00385                | 35.0199                                 | 45.3199                                 | 51.6199                                 | 58.2699                                 | 64.9899                                 | 74.0899                                 | 79.9999                                 |
| 15.                                                          | 0.00208                | 0.00416                | 34.9617                                 | 45.2617                                 | 51.5617                                 | 58.2117                                 | 64.9317                                 | 74.0317                                 | 79.9417                                 |
| 16.                                                          | 0.00202                | 0.00446                | 34.9018                                 | 45.2018                                 | 51.5018                                 | 58.1518                                 | 64.8718                                 | 73.9718                                 | 79.8818                                 |
| 17.                                                          | 0.00197                | 0.00475                | 34.8631                                 | 45.1631                                 | 51.4631                                 | 58.1131                                 | 64.8331                                 | 73.9331                                 | 79.8431                                 |
| 18.                                                          | 0.00191                | 0.00504                | 34.8272                                 | 45.1272                                 | 51.4272                                 | 58.0772                                 | 64.7972                                 | 73.8972                                 | 79.8072                                 |
| 19.                                                          | 0.00185                | 0.00534                | 34.7995                                 | 45.0995                                 | 51.3995                                 | 58.0495                                 | 64.7695                                 | 73.8695                                 | 79.7795                                 |
| 20.                                                          | 0.00180                | 0.00563                | 34.7786                                 | 45.0786                                 | 51.3786                                 | 58.0286                                 | 64.7486                                 | 73.8486                                 | 79.7586                                 |
| 21.                                                          | 0.00174                | 0.00592                | 34.7578                                 | 45.0578                                 | 51.3578                                 | 58.0078                                 | 64.7278                                 | 73.8278                                 | 79.7378                                 |
| 22.                                                          | 0.00168                | 0.00624                | 34.7325                                 | 45.0325                                 | 51.3325                                 | 57.9825                                 | 64.7025                                 | 73.8025                                 | 79.7125                                 |
| 23.                                                          | 0.00163                | 0.00651                | 34.7211                                 | 45.0211                                 | 51.3211                                 | 57.9711                                 | 64.6911                                 | 73.7911                                 | 79.7011                                 |

**Table S7.** The value of molar concentration of salt  $C_{\text{salt}}$  [mol/dm<sup>3</sup>], concentration of ligand  $C_{\text{lig}}$  [mol/dm<sup>3</sup>], molar conductivity  $\Lambda$  [S·cm<sup>2</sup>·mol<sup>-1</sup>] for 2-HP- $\beta$ -cyclodextrin with trans-caffeic acid sodium in water at all tested temperatures.

| sodium salt of trans-caffeic acid with 2-HP- $\beta$ -cyclodextrin |                        |                        |                                         |                                         |                                         |                                         |                                         |                                         |                                         |
|--------------------------------------------------------------------|------------------------|------------------------|-----------------------------------------|-----------------------------------------|-----------------------------------------|-----------------------------------------|-----------------------------------------|-----------------------------------------|-----------------------------------------|
| Nr                                                                 | $C_{\text{salt}}$      | $C_{\text{lig}}$       | 283.15                                  | 288.15                                  | 293.15                                  | 298.15                                  | 303.15                                  | 308.15                                  | 313.15                                  |
|                                                                    | [mol/dm <sup>3</sup> ] | [mol/dm <sup>3</sup> ] | $\Lambda_m$                             |
|                                                                    |                        |                        | [S·cm <sup>2</sup> ·mol <sup>-1</sup> ] |
| 1.                                                                 | 0.00293                | 0.00000                | 39.1703                                 | 44.3003                                 | 50.9703                                 | 57.8803                                 | 64.9503                                 | 73.9203                                 | 79.4103                                 |
| 2.                                                                 | 0.00288                | 0.00027                | 39.0980                                 | 44.2280                                 | 50.8980                                 | 57.8080                                 | 64.8780                                 | 73.8480                                 | 79.3380                                 |
| 3.                                                                 | 0.00282                | 0.00058                | 39.0073                                 | 44.1373                                 | 50.8073                                 | 57.7173                                 | 64.7873                                 | 73.7573                                 | 79.2473                                 |
| 4.                                                                 | 0.00276                | 0.00089                | 38.9465                                 | 44.0765                                 | 50.7465                                 | 57.6565                                 | 64.7265                                 | 73.6965                                 | 79.1865                                 |
| 5.                                                                 | 0.00270                | 0.00118                | 38.8598                                 | 43.9898                                 | 50.6598                                 | 57.5698                                 | 64.6398                                 | 73.6098                                 | 79.0998                                 |
| 6.                                                                 | 0.00264                | 0.00148                | 38.7627                                 | 43.8927                                 | 50.5627                                 | 57.4727                                 | 64.5427                                 | 73.5127                                 | 79.0027                                 |
| 7.                                                                 | 0.00258                | 0.00177                | 38.6753                                 | 43.8053                                 | 50.4753                                 | 57.3853                                 | 64.4553                                 | 73.4253                                 | 78.9153                                 |
| 8.                                                                 | 0.00253                | 0.00206                | 38.6196                                 | 43.7496                                 | 50.4196                                 | 57.3296                                 | 64.3996                                 | 73.3696                                 | 78.8596                                 |
| 9.                                                                 | 0.00247                | 0.00236                | 38.5258                                 | 43.6558                                 | 50.3258                                 | 57.2358                                 | 64.3058                                 | 73.2758                                 | 78.7658                                 |
| 10.                                                                | 0.00241                | 0.00268                | 38.4601                                 | 43.5901                                 | 50.2601                                 | 57.1701                                 | 64.2401                                 | 73.2101                                 | 78.7001                                 |
| 11.                                                                | 0.00235                | 0.00297                | 38.3780                                 | 43.5080                                 | 50.1780                                 | 57.0880                                 | 64.1580                                 | 73.1280                                 | 78.6180                                 |
| 12.                                                                | 0.00229                | 0.00326                | 38.3000                                 | 43.4300                                 | 50.1000                                 | 57.0100                                 | 64.0800                                 | 73.0500                                 | 78.5400                                 |
| 13.                                                                | 0.00223                | 0.00356                | 38.2285                                 | 43.3585                                 | 50.0285                                 | 56.9385                                 | 64.0085                                 | 72.9785                                 | 78.4685                                 |
| 14.                                                                | 0.00217                | 0.00385                | 38.1565                                 | 43.2865                                 | 49.9565                                 | 56.8665                                 | 63.9365                                 | 72.9065                                 | 78.3965                                 |
| 15.                                                                | 0.00212                | 0.00415                | 38.1036                                 | 43.2336                                 | 49.9036                                 | 56.8136                                 | 63.8836                                 | 72.8536                                 | 78.3436                                 |
| 16.                                                                | 0.00206                | 0.00444                | 38.0366                                 | 43.1666                                 | 49.8366                                 | 56.7466                                 | 63.8166                                 | 72.7866                                 | 78.2766                                 |
| 17.                                                                | 0.00200                | 0.00474                | 37.9803                                 | 43.1103                                 | 49.7803                                 | 56.6903                                 | 63.7603                                 | 72.7303                                 | 78.2203                                 |
| 18.                                                                | 0.00194                | 0.00504                | 37.9474                                 | 43.0774                                 | 49.7474                                 | 56.6574                                 | 63.7274                                 | 72.6974                                 | 78.1874                                 |
| 19.                                                                | 0.00188                | 0.00532                | 37.9001                                 | 43.0301                                 | 49.7001                                 | 56.6101                                 | 63.6801                                 | 72.6501                                 | 78.1401                                 |
| 20.                                                                | 0.00183                | 0.00562                | 37.8550                                 | 42.9850                                 | 49.6550                                 | 56.5650                                 | 63.6350                                 | 72.6050                                 | 78.0950                                 |
| 21.                                                                | 0.00177                | 0.00590                | 37.8102                                 | 42.9402                                 | 49.6102                                 | 56.5202                                 | 63.5902                                 | 72.5602                                 | 78.0502                                 |
| 22.                                                                | 0.00171                | 0.00621                | 37.7781                                 | 42.9081                                 | 49.5781                                 | 56.4881                                 | 63.5581                                 | 72.5281                                 | 78.0181                                 |
| 23.                                                                | 0.00165                | 0.00650                | 37.7784                                 | 42.9084                                 | 49.5784                                 | 56.4884                                 | 63.5584                                 | 72.5284                                 | 78.0184                                 |

**Table S8.** The value of molar concentration of salt  $C_{\text{salt}}$  [mol/dm<sup>3</sup>], concentration of ligand  $C_{\text{lig}}$  [mol/dm<sup>3</sup>], molar conductivity  $\Lambda$  [S·cm<sup>2</sup>·mol<sup>-1</sup>] for  $\beta$ -cyclodextrin with trans-ferulic acid sodium salt in water at all tested temperatures.

| sodium salt of trans-ferulic acid with $\beta$ -cyclodextrin |                        |                        |                                         |                                         |                                         |                                         |                                         |                                         |                                         |
|--------------------------------------------------------------|------------------------|------------------------|-----------------------------------------|-----------------------------------------|-----------------------------------------|-----------------------------------------|-----------------------------------------|-----------------------------------------|-----------------------------------------|
| Nr                                                           | $C_{\text{salt}}$      | $C_{\text{lig}}$       | 283.15                                  | 288.15                                  | 293.15                                  | 298.15                                  | 303.15                                  | 308.15                                  | 313.15                                  |
|                                                              | [mol/dm <sup>3</sup> ] | [mol/dm <sup>3</sup> ] | $\Lambda_m$                             |
|                                                              |                        |                        | [S·cm <sup>2</sup> ·mol <sup>-1</sup> ] |
| 1.                                                           | 0.00286                | 0.00000                | 38.2905                                 | 43.5205                                 | 50.8305                                 | 55.9705                                 | 62.5605                                 | 69.8405                                 | 77.0565                                 |
| 2.                                                           | 0.00281                | 0.00030                | 38.2204                                 | 43.4504                                 | 50.7604                                 | 55.9004                                 | 62.4904                                 | 69.7704                                 | 76.9864                                 |
| 3.                                                           | 0.00275                | 0.00059                | 38.0883                                 | 43.3183                                 | 50.6283                                 | 55.7683                                 | 62.3583                                 | 69.6383                                 | 76.8543                                 |
| 4.                                                           | 0.00270                | 0.00089                | 37.9823                                 | 43.2123                                 | 50.5223                                 | 55.6623                                 | 62.2523                                 | 69.5323                                 | 76.7483                                 |
| 5.                                                           | 0.00264                | 0.00117                | 37.8822                                 | 43.1122                                 | 50.4222                                 | 55.5622                                 | 62.1522                                 | 69.4322                                 | 76.6482                                 |
| 6.                                                           | 0.00258                | 0.00148                | 37.7979                                 | 43.0279                                 | 50.3379                                 | 55.4779                                 | 62.0679                                 | 69.3479                                 | 76.5639                                 |
| 7.                                                           | 0.00253                | 0.00178                | 37.6908                                 | 42.9208                                 | 50.2308                                 | 55.3708                                 | 61.9608                                 | 69.2408                                 | 76.4568                                 |
| 8.                                                           | 0.00247                | 0.00207                | 37.6202                                 | 42.8502                                 | 50.1602                                 | 55.3002                                 | 61.8902                                 | 69.1702                                 | 76.3862                                 |
| 9.                                                           | 0.00242                | 0.00236                | 37.5575                                 | 42.7875                                 | 50.0975                                 | 55.2375                                 | 61.8275                                 | 69.1075                                 | 76.3235                                 |
| 10.                                                          | 0.00236                | 0.00267                | 37.4855                                 | 42.7155                                 | 50.0255                                 | 55.1655                                 | 61.7555                                 | 69.0355                                 | 76.2515                                 |
| 11.                                                          | 0.00230                | 0.00296                | 37.4225                                 | 42.6525                                 | 49.9625                                 | 55.1025                                 | 61.6925                                 | 68.9725                                 | 76.1885                                 |
| 12.                                                          | 0.00225                | 0.00326                | 37.3625                                 | 42.5925                                 | 49.9025                                 | 55.0425                                 | 61.6325                                 | 68.9125                                 | 76.1285                                 |
| 13.                                                          | 0.00219                | 0.00355                | 37.3006                                 | 42.5306                                 | 49.8406                                 | 54.9806                                 | 61.5706                                 | 68.8506                                 | 76.0666                                 |
| 14.                                                          | 0.00213                | 0.00385                | 37.2442                                 | 42.4742                                 | 49.7842                                 | 54.9242                                 | 61.5142                                 | 68.7942                                 | 76.0102                                 |
| 15.                                                          | 0.00208                | 0.00415                | 37.1702                                 | 42.4002                                 | 49.7102                                 | 54.8502                                 | 61.4402                                 | 68.7202                                 | 75.9362                                 |
| 16.                                                          | 0.00202                | 0.00444                | 37.0894                                 | 42.3194                                 | 49.6294                                 | 54.7694                                 | 61.3594                                 | 68.6394                                 | 75.8554                                 |
| 17.                                                          | 0.00197                | 0.00473                | 37.0316                                 | 42.2616                                 | 49.5716                                 | 54.7116                                 | 61.3016                                 | 68.5816                                 | 75.7976                                 |
| 18.                                                          | 0.00191                | 0.00502                | 36.9555                                 | 42.1855                                 | 49.4955                                 | 54.6355                                 | 61.2255                                 | 68.5055                                 | 75.7215                                 |
| 19.                                                          | 0.00186                | 0.00530                | 36.9059                                 | 42.1359                                 | 49.4459                                 | 54.5859                                 | 61.1759                                 | 68.4559                                 | 75.6719                                 |
| 20.                                                          | 0.00180                | 0.00561                | 36.8825                                 | 42.1125                                 | 49.4225                                 | 54.5625                                 | 61.1525                                 | 68.4325                                 | 75.6485                                 |
| 21.                                                          | 0.00174                | 0.00590                | 36.8462                                 | 42.0762                                 | 49.3862                                 | 54.5262                                 | 61.1162                                 | 68.3962                                 | 75.6122                                 |
| 22.                                                          | 0.00169                | 0.00619                | 36.7849                                 | 42.0149                                 | 49.3249                                 | 54.4649                                 | 61.0549                                 | 68.3349                                 | 75.5509                                 |
| 23.                                                          | 0.00163                | 0.00649                | 36.7664                                 | 41.9964                                 | 49.3064                                 | 54.4464                                 | 61.0364                                 | 68.3164                                 | 75.5324                                 |



**Table S9.** The value of molar concentration of salt  $C_{\text{salt}}$  [mol/dm<sup>3</sup>], concentration of ligand  $C_{\text{lig}}$  [mol/dm<sup>3</sup>], molar conductivity  $\Lambda$  [S·cm<sup>2</sup>·mol<sup>-1</sup>] for 2-HP- $\beta$ -cyclodextrin with trans-ferulic acid sodium in water at all tested temperatures.

| sodium salt of trans-ferulic acid with 2-HP- $\beta$ -cyclodextrin |                        |                        |                                         |                                         |                                         |                                         |                                         |                                         |                                         |
|--------------------------------------------------------------------|------------------------|------------------------|-----------------------------------------|-----------------------------------------|-----------------------------------------|-----------------------------------------|-----------------------------------------|-----------------------------------------|-----------------------------------------|
| Nr                                                                 | $C_{\text{salt}}$      | $C_{\text{lig}}$       | 283.15                                  | 288.15                                  | 293.15                                  | 298.15                                  | 303.15                                  | 308.15                                  | 313.15                                  |
|                                                                    | [mol/dm <sup>3</sup> ] | [mol/dm <sup>3</sup> ] | $\Lambda_m$                             |
|                                                                    |                        |                        | [S·cm <sup>2</sup> ·mol <sup>-1</sup> ] |
| 1.                                                                 | 0.00299                | 0.00000                | 37.3739                                 | 42.4939                                 | 49.5139                                 | 54.4039                                 | 61.2739                                 | 68.5939                                 | 74.3039                                 |
| 2.                                                                 | 0.00293                | 0.00031                | 36.5034                                 | 41.6234                                 | 48.6434                                 | 53.5334                                 | 60.4034                                 | 67.7234                                 | 73.4334                                 |
| 3.                                                                 | 0.00287                | 0.00060                | 35.7002                                 | 40.8202                                 | 47.8402                                 | 52.7302                                 | 59.6002                                 | 66.9202                                 | 72.6302                                 |
| 4.                                                                 | 0.00281                | 0.00090                | 34.9065                                 | 40.0265                                 | 47.0465                                 | 51.9365                                 | 58.8065                                 | 66.1265                                 | 71.8365                                 |
| 5.                                                                 | 0.00275                | 0.00118                | 34.2136                                 | 39.3336                                 | 46.3536                                 | 51.2436                                 | 58.1136                                 | 65.4336                                 | 71.1436                                 |
| 6.                                                                 | 0.00269                | 0.00149                | 33.4562                                 | 38.5762                                 | 45.5962                                 | 50.4862                                 | 57.3562                                 | 64.6762                                 | 70.3862                                 |
| 7.                                                                 | 0.00263                | 0.00180                | 32.8092                                 | 37.9292                                 | 44.9492                                 | 49.8392                                 | 56.7092                                 | 64.0292                                 | 69.7392                                 |
| 8.                                                                 | 0.00257                | 0.00208                | 32.1365                                 | 37.2565                                 | 44.2765                                 | 49.1665                                 | 56.0365                                 | 63.3565                                 | 69.0665                                 |
| 9.                                                                 | 0.00251                | 0.00240                | 31.5643                                 | 36.6843                                 | 43.7043                                 | 48.5943                                 | 55.4643                                 | 62.7843                                 | 68.4943                                 |
| 10.                                                                | 0.00245                | 0.00269                | 31.1031                                 | 36.2231                                 | 43.2431                                 | 48.1331                                 | 55.0031                                 | 62.3231                                 | 68.0331                                 |
| 11.                                                                | 0.00239                | 0.00298                | 30.6091                                 | 35.7291                                 | 42.7491                                 | 47.6391                                 | 54.5091                                 | 61.8291                                 | 67.5391                                 |
| 12.                                                                | 0.00233                | 0.00328                | 30.1855                                 | 35.3055                                 | 42.3255                                 | 47.2155                                 | 54.0855                                 | 61.4055                                 | 67.1155                                 |
| 13.                                                                | 0.00227                | 0.00358                | 29.8261                                 | 34.9461                                 | 41.9661                                 | 46.8561                                 | 53.7261                                 | 61.0461                                 | 66.7561                                 |
| 14.                                                                | 0.00221                | 0.00388                | 29.5362                                 | 34.6562                                 | 41.6762                                 | 46.5662                                 | 53.4362                                 | 60.7562                                 | 66.4662                                 |
| 15.                                                                | 0.00215                | 0.00417                | 29.2471                                 | 34.3671                                 | 41.3871                                 | 46.2771                                 | 53.1471                                 | 60.4671                                 | 66.1771                                 |
| 16.                                                                | 0.00209                | 0.00447                | 28.9751                                 | 34.0951                                 | 41.1151                                 | 46.0051                                 | 52.8751                                 | 60.1951                                 | 65.9051                                 |
| 17.                                                                | 0.00203                | 0.00476                | 28.8454                                 | 33.9654                                 | 40.9854                                 | 45.8754                                 | 52.7454                                 | 60.0654                                 | 65.7754                                 |
| 18.                                                                | 0.00197                | 0.00506                | 28.6312                                 | 33.7512                                 | 40.7712                                 | 45.6612                                 | 52.5312                                 | 59.8512                                 | 65.5612                                 |
| 19.                                                                | 0.00191                | 0.00536                | 28.5111                                 | 33.6311                                 | 40.6511                                 | 45.5411                                 | 52.4111                                 | 59.7311                                 | 65.4411                                 |
| 20.                                                                | 0.00185                | 0.00566                | 28.4622                                 | 33.5822                                 | 40.6022                                 | 45.4922                                 | 52.3622                                 | 59.6822                                 | 65.3922                                 |
| 21.                                                                | 0.00180                | 0.00594                | 28.4407                                 | 33.5607                                 | 40.5807                                 | 45.4707                                 | 52.3407                                 | 59.6607                                 | 65.3707                                 |
| 22.                                                                | 0.00174                | 0.00624                | 28.4058                                 | 33.5258                                 | 40.5458                                 | 45.4358                                 | 52.3058                                 | 59.6258                                 | 65.3358                                 |
| 23.                                                                | 0.00168                | 0.00653                | 28.3756                                 | 33.4956                                 | 40.5156                                 | 45.4056                                 | 52.2756                                 | 59.5956                                 | 65.3056                                 |
